# Supplementary material
Source: ML conference proceedings conference paper supplement (https://proceedings.mlr.press/v97/wiqvist19a.html)
Supplement: Supplementary file 1 [file wiqvist19a-supp.pdf]

# Supplementary Material to:

## Partially Exchangeable Networks and Architectures for Learning Summary Statistics in Approximate Bayesian Computation

### Contents

|          |                                                                           |          |
|----------|---------------------------------------------------------------------------|----------|
| <b>1</b> | <b>Approximate Bayesian computation rejection sampling</b>                | <b>1</b> |
| 1.1      | Settings for ABC rejection sampling “reference table” algorithm . . . . . | 1        |
| 1.2      | The ABC distance function . . . . .                                       | 1        |
| <b>2</b> | <b>Regularization</b>                                                     | <b>1</b> |
| <b>3</b> | <b>g-and-k distribution</b>                                               | <b>2</b> |
| <b>4</b> | <b><math>\alpha</math>-stable distribution</b>                            | <b>2</b> |
| <b>5</b> | <b>Autoregressive time series model</b>                                   | <b>4</b> |
| <b>6</b> | <b>Moving average time series with observational noise model</b>          | <b>4</b> |

## 1 Approximate Bayesian computation rejection sampling

### 1.1 Settings for ABC rejection sampling “reference table” algorithm

In section 2 of the main paper we denote with  $x$  the ABC threshold. For g-and-k and  $\alpha$ -stable models we consider for  $x$  the 0.1th percentile, and for AR(2) and MA(2) the 0.02th percentile of all distances. The number of proposals for g-and-k and  $\alpha$ -stable models is  $\tilde{N} = 100,000$ , and for AR(2) and MA(2)  $\tilde{N} = 500,000$ .

### 1.2 The ABC distance function

In all our inference attempts we always used ABC rejection sampling and only needed to change the method used to compute the summary statistics. We employed the Mahalanobis distance

$$\Delta(s^*, s^{\text{obs}}) = \sqrt{(s^* - s^{\text{obs}})^\top A (s^* - s^{\text{obs}})},$$

where in our case  $A$  is the identity matrix, except when using *hand-picked* summary statistics for the g-and-k distribution, and in such case  $A$  is a diagonal matrix with diagonal elements  $1/w^2$ , with  $w$  a vector with entries  $w = [0.22; 0.19; 0.53; 2.97; 1.90]$ , as in Picchini and Anderson [2017].

## 2 Regularization

We use early-stopping for all networks. The early-stopping method used is to train the network over  $N$  epochs and then select the set of weights, out of the  $N$  sets, that generated the lowest evaluation error.

### 3 g-and-k distribution

- The full set of parameters for a g-and distribution is  $[A, B, g, k, c]$ , However, we follow the common practice of keeping  $c$  fixed to  $c = 0.8$  and assume  $B > 0$  and  $k \geq 0$  Prangle [2017].
- Here is a procedure to simulate a single draw from the distribution: we first simulate a draw  $z$  from a standard Gaussian distribution,  $z \sim N(0, 1)$ , then we plug  $z$  into

$$Q = A + B \cdot (1 + c \cdot \tanh(g \cdot z/2)) \cdot z \cdot (1 + z^2)^k$$

and obtain a realization  $Q$  from a g-and-k distribution.

- The network settings are presented in Table 1, 2, 3, and 4;
- The number of weights for the different networks are presented in Table 5;
- Values outside of the range  $[-10, 50]$  are considered to be outliers and these values are replaced (at random) with values inside the data range. The data cleaning scheme is applied to both the observed and generated data;
- When computing the empirical distribution function we evaluate this function over 100 equally spaced points between 0 and 50;
- Number of training observations:  $5 \cdot 10^5$ ,  $10^5$ ,  $10^4$ , and  $10^3$ . Evaluation data observations  $5 \cdot 10^3$ .

Table 1: g-and-k: Network settings for MLP small Table 2: g-and-k: Network settings for MLP large.

| Layer    | Dim. in | Dim. out | Activation |
|----------|---------|----------|------------|
| Input    | 1000    | 25       | relu       |
| Hidden 1 | 25      | 25       | relu       |
| Hidden 2 | 25      | 12       | relu       |
| Output   | 12      | 4        | linear     |

| Layer    | Dim. in | Dim. out | Activation |
|----------|---------|----------|------------|
| Input    | 1000    | 100      | relu       |
| Hidden 1 | 100     | 100      | relu       |
| Hidden 2 | 100     | 50       | relu       |
| Output   | 50      | 4        | linear     |

Table 3: g-and-k: Network settings MLP pre

| Layer    | Dim. in | Dim. out | Activation |
|----------|---------|----------|------------|
| Input    | 100     | 100      | relu       |
| Hidden 1 | 100     | 100      | relu       |
| Hidden 2 | 100     | 50       | relu       |
| Output   | 50      | 4        | linear     |

Table 4: g-and-k: Network settings for PEN-0  $\phi$  network

| Layer    | Dim. in | Dim. out | Activation |
|----------|---------|----------|------------|
| Input    | 1       | 100      | relu       |
| Hidden 1 | 100     | 50       | relu       |
| Output   | 50      | 10       | linear     |

$\rho$  network

| Layer    | Dim. in | Dim. out | Activation |
|----------|---------|----------|------------|
| Input    | 10      | 100      | relu       |
| Hidden 1 | 100     | 100      | relu       |
| Hidden 2 | 100     | 50       | relu       |
| Output   | 50      | 4        | linear     |

### 4 $\alpha$ -stable distribution

- The characteristic function  $\varphi(x)$  for the  $\alpha$ -stable distribution is given by Ong et al. [2018]

Table 5: g-and-k: Number of weights for the different networks

| Network   | # weights |
|-----------|-----------|
| MLP small | 26039     |
| MLP large | 115454    |
| MLP pre   | 25454     |
| PEN-0     | 22214     |

$$\varphi(x) = \begin{cases} \exp\left(i\delta t - \gamma^\alpha |t|^\alpha (1 + i\beta \tan \frac{\pi\alpha}{2} \operatorname{sgn}(t)(|\gamma t|^{1-\alpha} - 1))\right), & \alpha \neq 1, \\ \exp\left(i\delta t - \gamma |t| (1 + i\beta \frac{2}{\pi} \operatorname{sgn}(t) \log(\gamma |t|))\right), & \alpha = 1, \end{cases}$$

where  $\operatorname{sgn}$  is the sign function, i.e.

$$\operatorname{sgn}(t) = \begin{cases} -1 & \text{if } t < 0, \\ 0 & \text{if } t = 0, \\ 1 & \text{if } t > 0. \end{cases}$$

- The network settings are presented in Table 6, 7, 8, and 9;
- The number of weights for the different networks are presented in Table 10;
- Values outside of the range  $[-10, 50]$  are considered to be outliers and these values are replaced (at random) with values inside the data range. The data cleaning scheme is applied to both the observed and generated data;
- All data sets are standardized using the “robust scalar” method, i.e. each data point  $y_i$  is standardized according to

$$\frac{y_i + Q_1(y)}{Q_3(y) - Q_1(y)}$$

where  $Q_1$  and  $Q_3$  are the first and third quantiles respectively;

- When computing the empirical distribution function we evaluate this function over 100 equally spaced points between -10 and 100;
- The root-mean-squared error (RMSE) is computed as

$$\text{RMSE} = \sqrt{\frac{1}{R} \sum_{i=1}^R \{(\hat{\theta}_i^1 - \theta^1)^2 + (\hat{\theta}_i^2 - \theta^2)^2 + (\hat{\theta}_i^3 - \theta^3)^2 + (\hat{\theta}_i^4 - \theta^4)^2\}}$$

where  $\theta = [\theta^1, \theta^2, \theta^3, \theta^4]$  are ground-truth parameter values and  $[\hat{\theta}_i^1, \hat{\theta}_i^2, \hat{\theta}_i^3, \hat{\theta}_i^4]_{1 \leq i \leq R}$  are ABC posterior means.  $R$  is the number of independent repetitions of the inference procedure;

- Number of training observations:  $5 \cdot 10^5$ ,  $10^5$ ,  $10^4$ , and  $10^3$ . Evaluation data observations  $5 \cdot 10^3$ .

Table 6:  $\alpha$ -stable: Network settings for MLP small. Table 7:  $\alpha$ -stable: Network settings for MLP large.

| Layer    | Dim. in | Dim. out | Activation |
|----------|---------|----------|------------|
| Input    | 1002    | 25       | relu       |
| Hidden 1 | 25      | 25       | relu       |
| Hidden 2 | 25      | 12       | relu       |
| Output   | 12      | 4        | linear     |

| Layer    | Dim. in | Dim. out | Activation |
|----------|---------|----------|------------|
| Input    | 1002    | 100      | relu       |
| Hidden 1 | 100     | 100      | relu       |
| Hidden 2 | 100     | 50       | relu       |
| Output   | 50      | 4        | linear     |

Table 8:  $\alpha$ -stable: Network settings MLP pre.

| Layer    | Dim. in | Dim. out | Activation |
|----------|---------|----------|------------|
| Input    | 100     | 100      | relu       |
| Hidden 1 | 100     | 100      | relu       |
| Hidden 2 | 100     | 50       | relu       |
| Output   | 50      | 4        | linear     |

Table 9:  $\alpha$ -stable: Network settings for PEN-0.  $\phi$  network

| Layer    | Dim. in | Dim. out | Activation |
|----------|---------|----------|------------|
| Input    | 1       | 100      | relu       |
| Hidden 1 | 100     | 50       | relu       |
| Output   | 50      | 20       | linear     |

$\rho$  network

| Layer    | Dim. in | Dim. out | Activation |
|----------|---------|----------|------------|
| Input    | 22      | 100      | relu       |
| Hidden 1 | 100     | 100      | relu       |
| Hidden 2 | 100     | 50       | relu       |
| Output   | 50      | 4        | linear     |

Table 10:  $\alpha$ -stable: Number of weights for the different networks

| Network   | # weights |
|-----------|-----------|
| MLP small | 26089     |
| MLP large | 115654    |
| MLP pre   | 25454     |
| PEN-0     | 23924     |

## 5 Autoregressive time series model

- The network settings are presented in Table 11, 12, 13, and 14;
- The number of weights for the different networks are presented in Table 15;
- Number of training observations:  $10^6$ ,  $10^5$ ,  $10^4$ , and  $10^3$ . Evaluation data observations  $10^4$ .

## 6 Moving average time series with observational noise model

- The network settings are presented in Table 16, 17, 18, and 19;
- The number of weights for the different networks are presented in Table 20;
- Number of training observations:  $10^6$ ,  $10^5$ ,  $10^4$ , and  $10^3$ . Evaluation data observations  $5 \cdot 10^5$ .

Table 11: AR(2): Network settings for MLP small.

| Layer    | Dim. in | Dim. out | Activation |
|----------|---------|----------|------------|
| Input    | 100     | 55       | relu       |
| Hidden 1 | 55      | 55       | relu       |
| Hidden 2 | 55      | 25       | relu       |
| Output   | 25      | 2        | linear     |

Table 13: AR(2): Network settings for PEN-0.  
 $\phi$  network

| Layer    | Dim. in | Dim. out | Activation |
|----------|---------|----------|------------|
| Input    | 1       | 100      | relu       |
| Hidden 1 | 100     | 50       | relu       |
| Output   | 50      | 10       | linear     |

 $\rho$  network

| Layer    | Dim. in | Dim. out | Activation |
|----------|---------|----------|------------|
| Input    | 10      | 50       | relu       |
| Hidden 1 | 50      | 50       | relu       |
| Hidden 2 | 50      | 20       | relu       |
| Output   | 20      | 2        | linear     |

Table 12: AR(2): Network settings for MLP large.

| Layer    | Dim. in | Dim. out | Activation |
|----------|---------|----------|------------|
| Input    | 100     | 100      | relu       |
| Hidden 1 | 100     | 100      | relu       |
| Hidden 2 | 100     | 50       | relu       |
| Output   | 50      | 2        | linear     |

Table 14: AR(2): Network settings for PEN-2.  
 $\phi$  network

| Layer    | Dim. in | Dim. out | Activation |
|----------|---------|----------|------------|
| Input    | 3       | 100      | relu       |
| Hidden 1 | 100     | 50       | relu       |
| Output   | 50      | 10       | linear     |

 $\rho$  network

| Layer    | Dim. in | Dim. out | Activation |
|----------|---------|----------|------------|
| Input    | 12      | 50       | relu       |
| Hidden 1 | 50      | 50       | relu       |
| Hidden 2 | 50      | 20       | relu       |
| Output   | 20      | 2        | linear     |

Table 15: AR(2): Number of weights for the different networks

| Network   | # weights |
|-----------|-----------|
| MLP small | 10087     |
| MLP large | 25352     |
| PEN-0     | 9922      |
| PEN-2     | 10222     |

Table 16: MA(2): Network settings for MLP small.

| Layer    | Dim. in | Dim. out | Activation |
|----------|---------|----------|------------|
| Input    | 100     | 60       | relu       |
| Hidden 1 | 60      | 60       | relu       |
| Hidden 2 | 60      | 25       | relu       |
| Output   | 25      | 2        | linear     |

Table 18: MA(2): Network settings for PEN-0.  
 $\rho$  network

| Layer    | Dim. in | Dim. out | Activation |
|----------|---------|----------|------------|
| Input    | 1       | 100      | relu       |
| Hidden 1 | 100     | 50       | relu       |
| Hidden 2 | 50      | 10       | relu       |

 $\phi$  network

| Layer    | Dim. in | Dim. out | Activation |
|----------|---------|----------|------------|
| Input    | 10      | 50       | relu       |
| Hidden 1 | 50      | 50       | relu       |
| Hidden 2 | 50      | 20       | relu       |
| Output   | 20      | 2        | linear     |

Table 17: MA(2): Network settings for MLP large.

| Layer    | Dim. in | Dim. out | Activation |
|----------|---------|----------|------------|
| Input    | 100     | 100      | relu       |
| Hidden 1 | 100     | 100      | relu       |
| Hidden 2 | 100     | 50       | relu       |
| Output   | 50      | 2        | linear     |

Table 19: MA(2): Network settings for PEN-10  
 $\rho$  network

| Layer    | Dim. in | Dim. out | Activation |
|----------|---------|----------|------------|
| Input    | 11      | 100      | relu       |
| Hidden 1 | 100     | 50       | relu       |
| Hidden 2 | 50      | 10       | relu       |

 $\phi$  network

| Layer    | Dim. in | Dim. out | Activation |
|----------|---------|----------|------------|
| Input    | 20      | 50       | relu       |
| Hidden 1 | 50      | 50       | relu       |
| Hidden 2 | 50      | 20       | relu       |
| Output   | 20      | 2        | linear     |

Table 20: MA(2): Number of weights for the different networks

| Network   | # weights |
|-----------|-----------|
| MLP small | 11297     |
| MLP large | 25352     |
| PEN-0     | 9922      |
| PEN-10    | 11422     |

## References

- V. M. Ong, D. J. Nott, M.-N. Tran, S. A. Sisson, and C. C. Drovandi. Variational bayes with synthetic likelihood. *Statistics and Computing*, 28(4):971–988, 2018.
- U. Picchini and R. Anderson. Approximate maximum likelihood estimation using data-cloning ABC. *Computational Statistics & Data Analysis*, 105:166–183, 2017.
- D. Prangle. gk: An R package for the g-and-k and generalised g-and-h distributions. *arXiv:1706.06889*, 2017.
